1 Virtual peer role-play during COVID-19 pandemic for teaching medical students how to break bad  
2 news

3 **Running Title.** Virtual peer role-play to break bad news

4

5 Jebrane **Bouaoud**<sup>1,2</sup> MD PhD student, Pierre **Saintigny**<sup>1,3</sup> MD PhD

6 1-Université de Lyon, Université Claude Bernard Lyon 1, Faculté de Médecine Lyon-Est, Lyon, F-  
7 69008, France.

8 2-Sorbonne Université, Department of Maxillo-Facial Surgery, Hôpital Pitié-Salpêtrière, Assistance  
9 Publique des Hôpitaux de Paris, Paris, France

10 3-Department of Medical Oncology, Centre Léon Bérard, Lyon 69008, France.

11

12 **Corresponding author**

13 Pierre Saintigny, M.D., Ph.D., Centre Léon Bérard, 28 Promenade Léa et Napoléon Bullukian, 69008

14 Lyon, France, Email: [pierre.saintigny@lyon.unicancer.fr](mailto:pierre.saintigny@lyon.unicancer.fr)

15

16 **Word count:** 1046 words

17

18 **DECLARATION OF INTEREST STATEMENT**

19 The authors report no conflicts of interest.

20

21 **Funding source:** None

22

23 **ACKNOWLEDGMENTS**

24 The authors would thank Anaïs Saintigny (Pharmacy Student), Nathalie Borel (Medical Assistant),

25 Professor Rode Gilles (Dean of the Université Claude Bernard Lyon 1, France) and Professor Debra

26 Roter (Johns Hopkins Bloomberg School of Public Health) for their supports

27

28 **Abstract**

29

30 In order to cope with the SARS-CoV-2 pandemic and meet with the educational needs of medical  
31 students, we have evaluated the virtual peer role-plays (VPRP), an innovative approach to teach  
32 breaking bad news communication skills to medical students. Three scenarios of relational simulation  
33 were successively proposed to 237 medical students divided in 10 groups, each supervised by two  
34 teachers. Pre- and post-VPRP questionnaires were submitted to evaluate students' satisfaction. The  
35 response rate of the pre- and post-VPRP questionnaires were 89% and 52% respectively. Two-thirds  
36 of the students had never participated in a peer role-play session. Most students had low level of  
37 confidence in breaking bad news communication and were motivated to participate to the VPRP  
38 session. Students' satisfaction on VPRP session regarding quality (realism, organization), interest,  
39 perceived benefits was very positive. In conclusion, VPRP are feasible, of low cost (no material is  
40 required), applicable to other healthcare students and is relevant to the growth of teleconsultation.

41

42 **Key words:** Simulation; peer role-play; medical students; communication skills; virtual; crisis  
43 resource management; COVID-19

## 44 **INTRODUCTION**

45 Breaking bad news communication is one of the most challenging skills to teach to medical students  
46 [1]. Among simulation-based training methods, peer role-play is usually appreciated and seems  
47 improve communication skills in medical students [2].

48 SARS-CoV-2 pandemic has led to public health measures to prevent the virus spreading that  
49 significantly impacted medical students' curriculum including formal lectures, directed studies, and  
50 practical work [3]. In particular, the directed studies to teach communication skills on how to break  
51 bad news are not anymore possible as they require simulation-based face-to-face peer-role play in  
52 small teaching rooms including 20-25 students. Because breaking bad news to patients is an important  
53 responsibility of physicians and a source of anxiety among medical students, and to meet students'  
54 educational needs, we decided to maintain a training session for breaking bad news communication in  
55 the oncology field by proposing innovative virtual peer role-plays (VPRP).

56

## 57 **MATERIALS AND METHODS**

58 Each VPRP session were supervised by two teachers (medical practitioners in oncology) and included  
59 20-25 undergraduate medical students and lasted two hours. After reviewing the learning objectives,  
60 teachers reminded general principles of communication and relational skills such as learning to listen,  
61 working on one's own emotions and building a quality relationship with the patient. Then a 30 minutes  
62 brainstorming was done around a challenging clinical situation (newly diagnosed metastatic pancreatic  
63 adenocarcinoma in a 65-year-old patient). The following question "how to give hope to a patient in a  
64 seemingly hopeless situation" was discussed, allowing to provide tips and advices to the students.  
65 Finally, the actual VPRP began. Three relational simulation scenarios were proposed: the first two  
66 were teleconsultations and the third one was a phone call (Supplemental Material 1-3). On a voluntary  
67 basis, two students participated to the first VPRP session. In two virtual rooms, isolated from the rest  
68 of the group, one of the teachers presented the scenario to the student playing the patient's role, while  
69 the other teacher presented the scenario to the second student playing the doctor's role. After 5  
70 minutes of briefing, both students performed the VPRP in front of all the other students and teachers.  
71 Only the two "actor" students had their webcams and microphones on. The students were reminded

72 that they could "Stop" the play in case they felt uncomfortable and/or to get some advices and to  
73 "Rewind" the peer role play to try another approach. After the VPRP session, the debriefing was  
74 conducted by the two teachers, starting with the student who played the "doctor," and then the student  
75 who played the "patient", then the other students. Several points were discussed such as their feelings  
76 during the play, and tips were given to feel more comfortable with breaking bad news communication  
77 while preserving the attention and the confidence of the patient. The second and third VPRP session  
78 were then successively played by two other couple of students playing the roles of the "patient or  
79 trusted support person" or the "doctor". The two teachers wrapped-up the session by summarizing key  
80 points discussed during the three debriefings.

81 Before the VPRP session, each students was asked to complete a 5 items self-questionnaire to collect  
82 basic students characteristics (age, gender), as well as the following information: i-whether they had  
83 any previous experience in a peer role-play to develop communication skills for breaking bad news, ii-  
84 whether they felt confident regarding their ability to communicate breaking bad news to a patient (six-  
85 point likert scale) and iii-whether they were motivated to participate in the VPRP session (six-point  
86 likert scale).

87 Based on the level 1 of the Kirkpatrick training evaluation model (*i.e.*, "Reaction")[4], a post-VPRP  
88 session self-questionnaire (7-item questionnaire) was proposed to students.

89

## 90 **RESULTS**

91 Overall, 10 VPRP sessions were organized simultaneously. A total of 237 students received the  
92 training. The response rate to the pre-VPRP session questionnaire was 89% (212/237 students). The  
93 mean age of the students was 22 years old (range 19-36) and the male/female sex ratio was 0.72. Two-  
94 thirds of the students had never participated to any peer role-play session. Most students had a low  
95 level of confidence (level 1-3, 70%; median=3) in breaking bad news but were motivated to  
96 participate to the VPRP session (level 4-6, 58%; median=5) (Supplemental Material 4).

97 The response rate to the post-VPRP session questionnaire was 52% (111/212 students). Most students  
98 (95%) rated the teaching as good to excellent and the scenario as very realistic (77%) (Supplemental  
99 Material 5). Most of them (67%) reported a great interest in VPRP session participation. Indeed, 86%

100 of students stated that VPRP session was a helpful training in breaking bad news communication  
101 (Figure 1). In particular, most of them (80%) felt better prepared for breaking bad news  
102 communication after the VPRP session and recommended (89%) that the VPRP training session being  
103 maintained in the curriculum of future students (Supplemental Material 6).

104

## 105 **DISCUSSION**

106 The value in medical curricula as well as major advantages in terms of cost-effectiveness of Peer role  
107 play have already been reported [5]. Interestingly, we found that students' satisfaction on Virtual-PRP  
108 sessions regarding quality (realism, organization), interest, and perceived benefits was high. The  
109 VPRP session for breaking bad news communication offers several advantages. VPRP are low-cost  
110 (no material is required), and easily applicable to other healthcare students, which is of great interest.  
111 It allowed teaching continuation despite SARS-CoV-2-related public health measures and associated  
112 restrictions. Moreover, VPRP sessions address the specific challenge of teleconsultations and  
113 telephonic conversations. Our scenarios (two teleconsultations and one phone call) were particularly  
114 realistic given the actual pandemic. One fundamental aspect is the importance of structured pre-  
115 defined scenario as well as post-VPRP briefing to homogenize the learning skills. Involving  
116 physicians in the VPRP-sessions allowed us to ensure students supervision, support and feedbacks  
117 which are of great importance [6].

118 The main limitation of our VPRP sessions is that a minority of students actively played the role of  
119 “patient or trusted support person” or of the “doctor” (only 20% of students were “actors” during our  
120 sessions). This could be addressed by increasing the number of virtual rooms in each session. Overall,  
121 while the 52% rate of response to the post-VPRP questionnaire may be associated with a potential  
122 bias, we feel VPRP sessions are realistic, valuable and an effective method for learning breaking bad  
123 news communication skills. Future studies should evaluate the “learning” benefits of VPRP *i.e.*,  
124 knowledge, skills, attitudes and perceptions (confidence, commitment).

125 **REFERENCES**

- 126 **1** Spencer J. Learning how to break bad news--more than following the rules. *Med Teach*  
127 2012;34:349–50. doi:10.3109/0142159X.2012.672778
- 128 **2** Gelis A, Cervello S, Rey R, *et al.* Peer Role-Play for Training Communication Skills in  
129 Medical Students: A Systematic Review. *Simulation in Healthcare* 2020;15:106–11.  
130 doi:10.1097/SIH.0000000000000412
- 131 **3** Li L, Lin M, Wang X, *et al.* Preparing and responding to 2019 novel coronavirus with  
132 simulation and technology-enhanced learning for healthcare professionals: challenges and  
133 opportunities in China. *BMJ Simul Technol Enhanc Learn* 2020;6:196–8. doi:10.1136/bmjstel-  
134 2020-000609
- 135 **4** Kirkpatrick D, Kirkpatrick J. *Evaluating Training Programs: The Four Levels*. San  
136 Francisco, California: : Berrett-Koehler Publishers 2006.
- 137 **5** Bosse HM, Nickel M, Huwendiek S, *et al.* Cost-effectiveness of peer role play and  
138 standardized patients in undergraduate communication training. *BMC Medical Education*  
139 2015;15:183. doi:10.1186/s12909-015-0468-1
- 140 **6** Weel-Baumgarten EM van, Brouwers M, Grosfeld F, *et al.* Teaching and training in breaking  
141 bad news at the Dutch medical schools: A comparison. *Medical Teacher* 2012;34:373–81.  
142 doi:10.3109/0142159X.2012.668247

143

144 **FIGURES LEGENDS**

145 **Figure 1.** Histograms showing responses to the post-Virtual peer role-plays training session  
146 questionnaire, in particular regarding interest (**A**) and perceived benefits (**B**) of the training sessions.

147

148 **SUPPLEMENTARY MATERIAL**

149 **Supplementary material 1.** Virtual peer role play session, scenario 1

150 **Supplementary material 2.** Virtual peer role play session, scenario 2

151 **Supplementary material 3.** Virtual peer role play session, scenario 3

152 **Supplementary material 4.** Responses to the pre-VPRP training session questionnaire

153 **Supplementary material 5.** Histograms showing responses to the post-Virtual peer role-plays  
154 training session questionnaire, in particular regarding the quality (**A**) and realism (**B**) of the training  
155 sessions.

156 **Supplementary material 6.** Histograms showing responses to the post-Virtual peer role-plays  
157 training session questionnaire, in particular regarding perceived benefits (**A**) and interest (**B**) of the  
158 training sessions.

**A**

Would you say that participating in this teaching was worth it?

110 responses

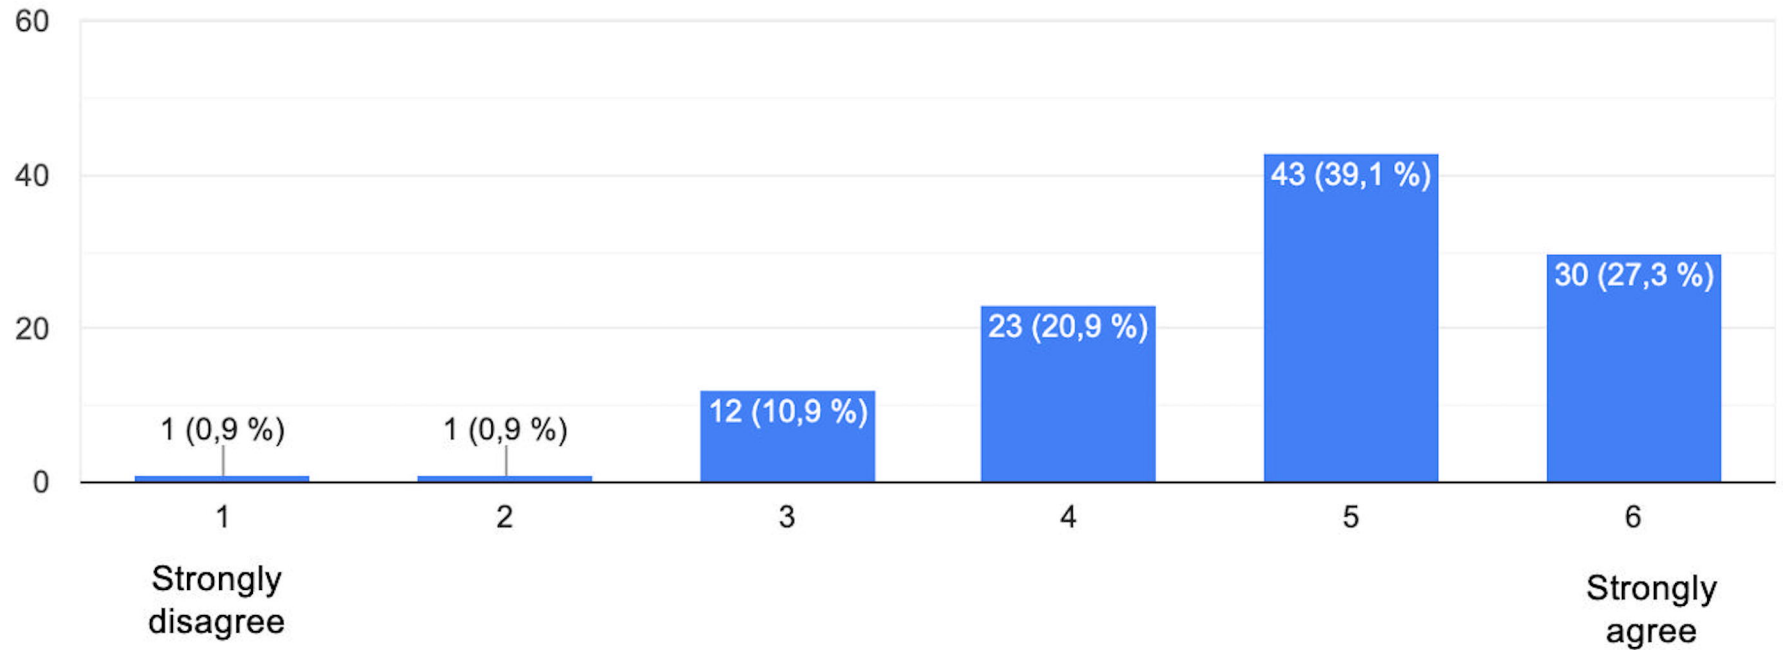**B**

Would you say this teaching has been helpful in training you in communicating bad news to a patient?

111 replies

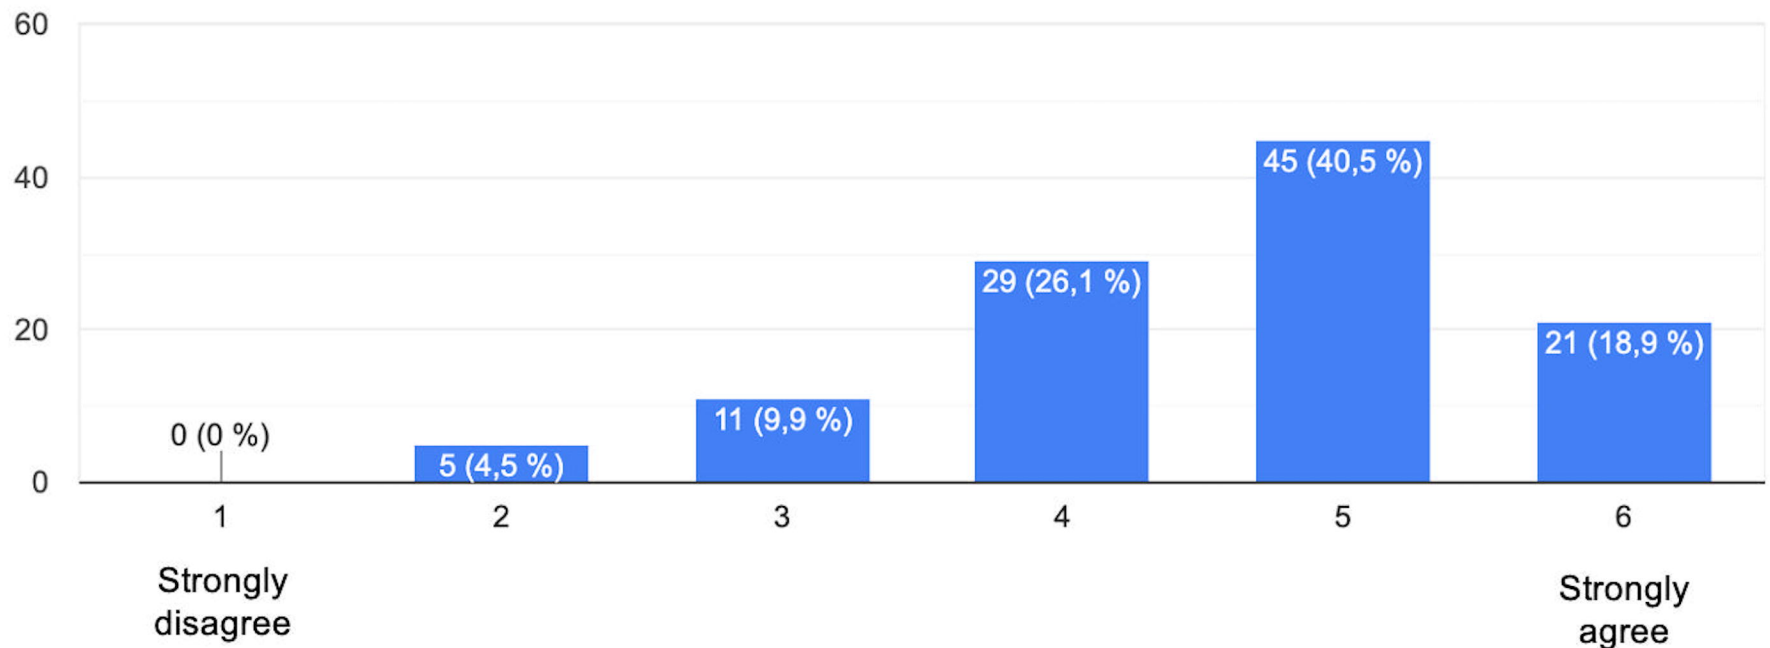

Source: https://medrxiv.org/content/medrxiv/early/2021/03/26/2021.03.25.21254288.full.pdf
