# Supplementary material for: Virtual peer role-play during COVID-19 pandemic for teaching medical students how to break bad news
Source: bioRxiv or medRxiv preprint supplement (doi:10.1101/2021.03.25.21254288), 2021-03-26

# Supplementary Material 4

## How would you rate your level of confidence in your ability to deliver bad news to a patient?

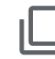

212 replies

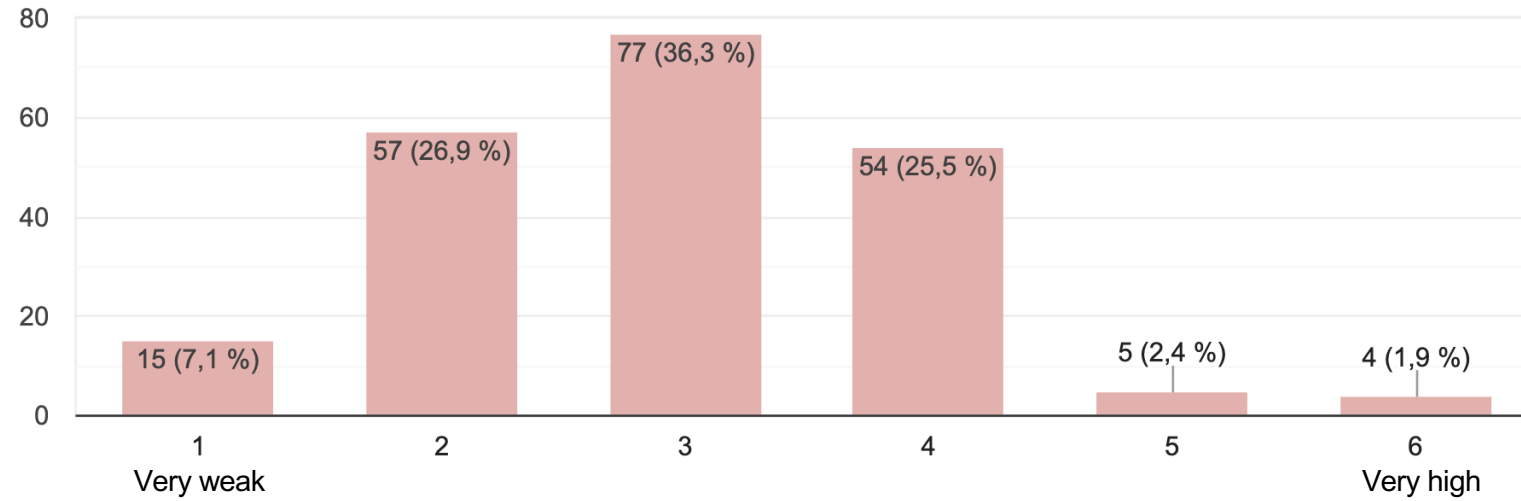

## How would you judge your motivation to participate in this teaching?

211 replies

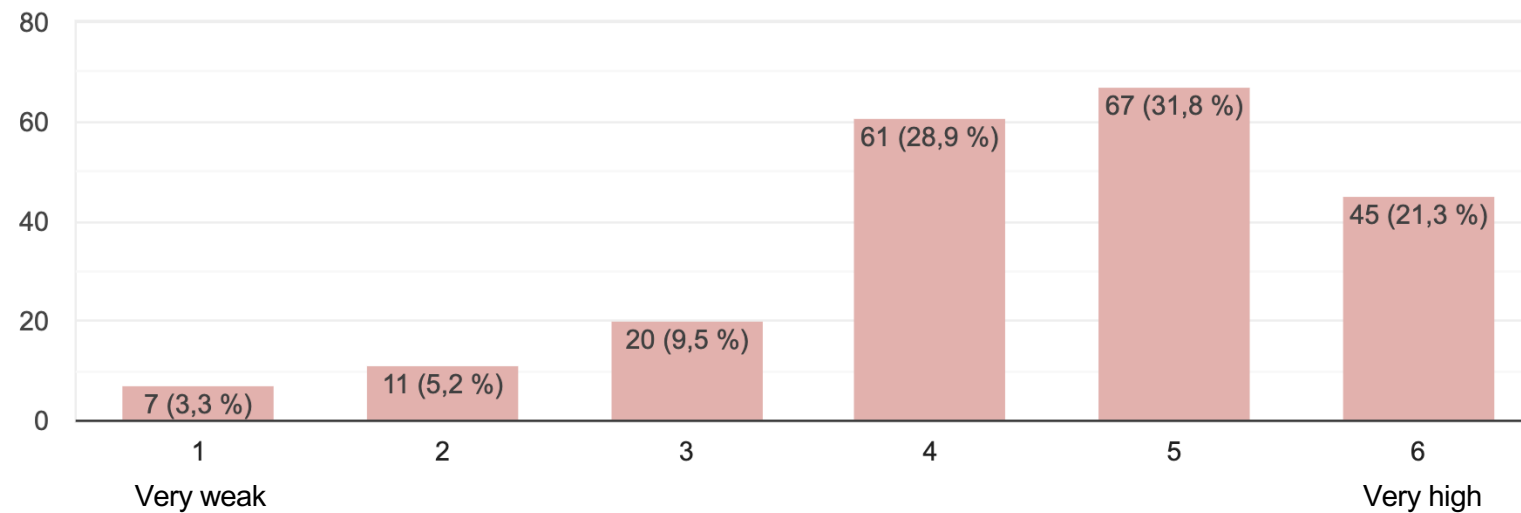

Supplement: Supplementary file [file media-4.pdf]
