# Supplementary material for: Virtual peer role-play during COVID-19 pandemic for teaching medical students how to break bad news
Source: bioRxiv or medRxiv preprint supplement (doi:10.1101/2021.03.25.21254288), 2021-03-26

# Supplementary Material 6

**A**

Would you say that you feel like you are better prepared to deliver bad news to a patient?

110 responses

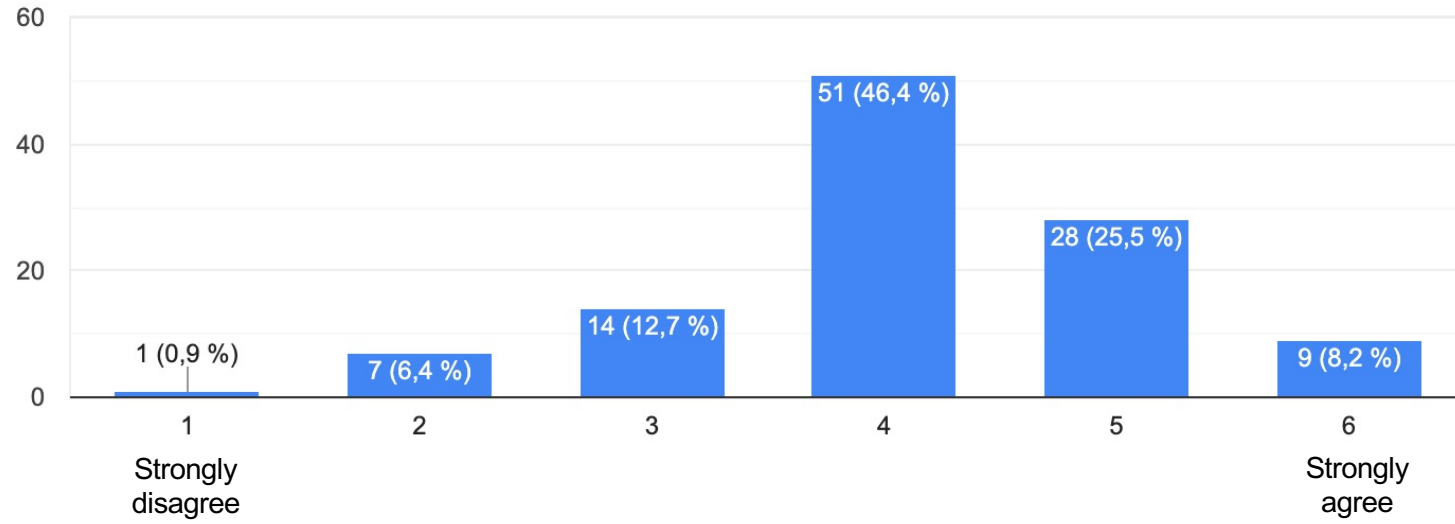

**B**

Would you recommend continuing this education next year?

111 replies

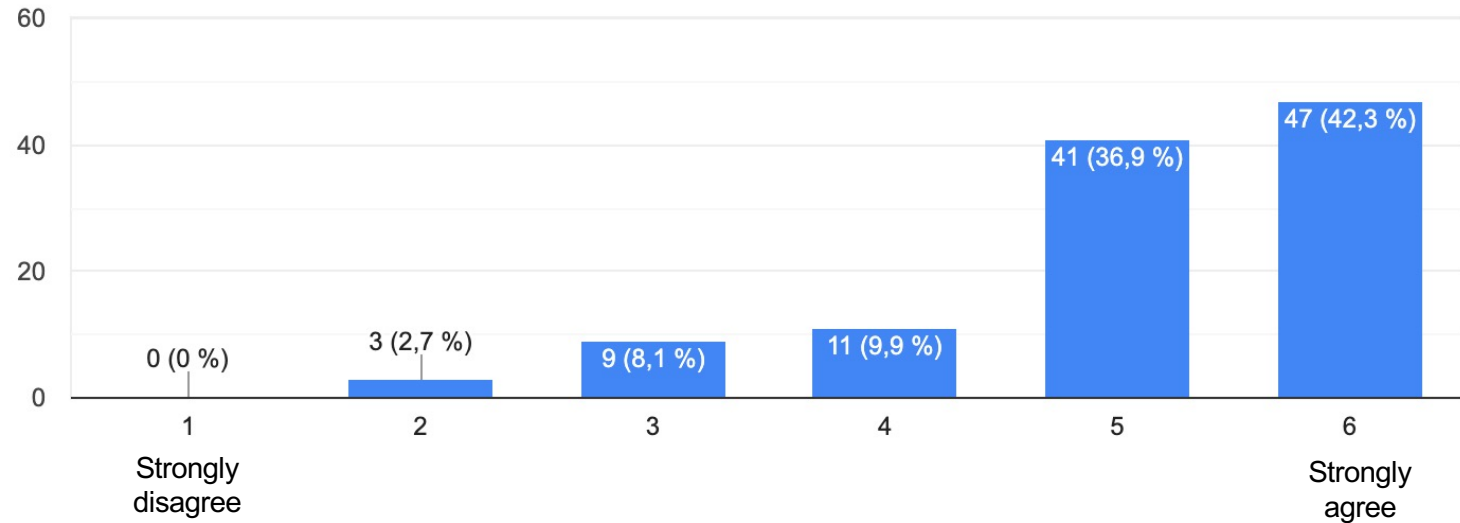

Supplement: Supplementary file [file media-5.pdf]
