# Supplementary material for: Virtual peer role-play during COVID-19 pandemic for teaching medical students how to break bad news
Source: bioRxiv or medRxiv preprint supplement (doi:10.1101/2021.03.25.21254288), 2021-03-26

# Supplementary Material 5

## A

Would you say that participating in this teaching was worth it?

110 responses

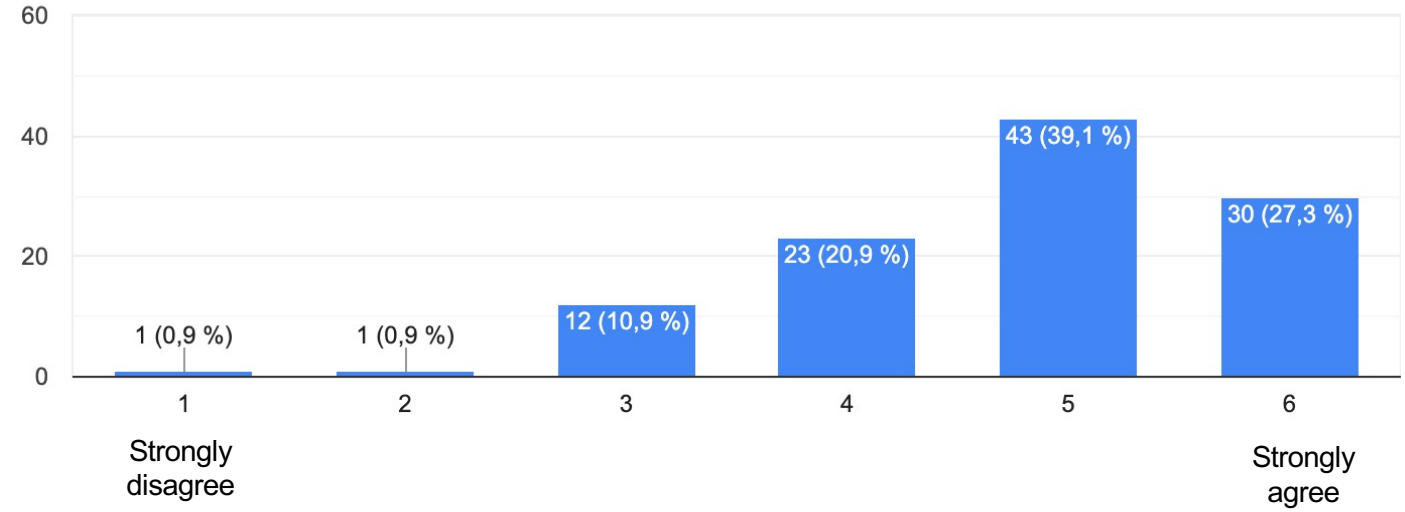

## B

Would you say this teaching has been helpful in training you in communicating bad news to a patient?

111 replies

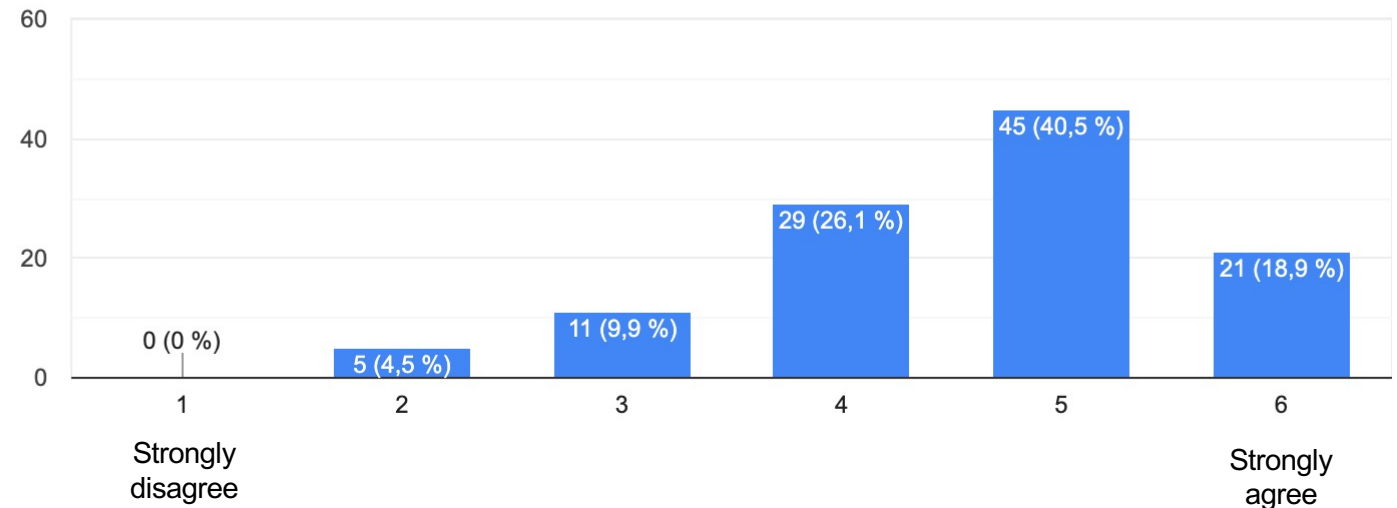

Supplement: Supplementary file [file media-6.pdf]
